# Supplementary material for: Age and origin of groundwater resources in the Ararat Valley, Armenia: a baseline study applying hydrogeochemistry and environmental tracers
Source: Springer Nature journal article supplement (doi:10.1007/s10040-021-02390-4), 2021-08-28
Supplement: MOESM1 [file 10040_2021_2390_MOESM1_ESM.pdf]

**Age and origin of groundwater resources in the Ararat Valley, Armenia: a baseline study applying hydrogeochemistry and environmental tracers**

Michael Schubert, Nils Michelsen, Axel Schmidt, Laura Eichenauer, Kay Knoeller, Alexander Arakelyan, Lilith Harutyunyan, Christoph Schüth

Electronic supplementary material – Hydrogeology Journal

**Corresponding author:** Christoph Schüth, Technical University of Darmstadt, Institute of Applied Geosciences, Darmstadt, Germany  
(schueth@geo.tu-darmstadt.de)

Figs. S1 – S7

Table S1

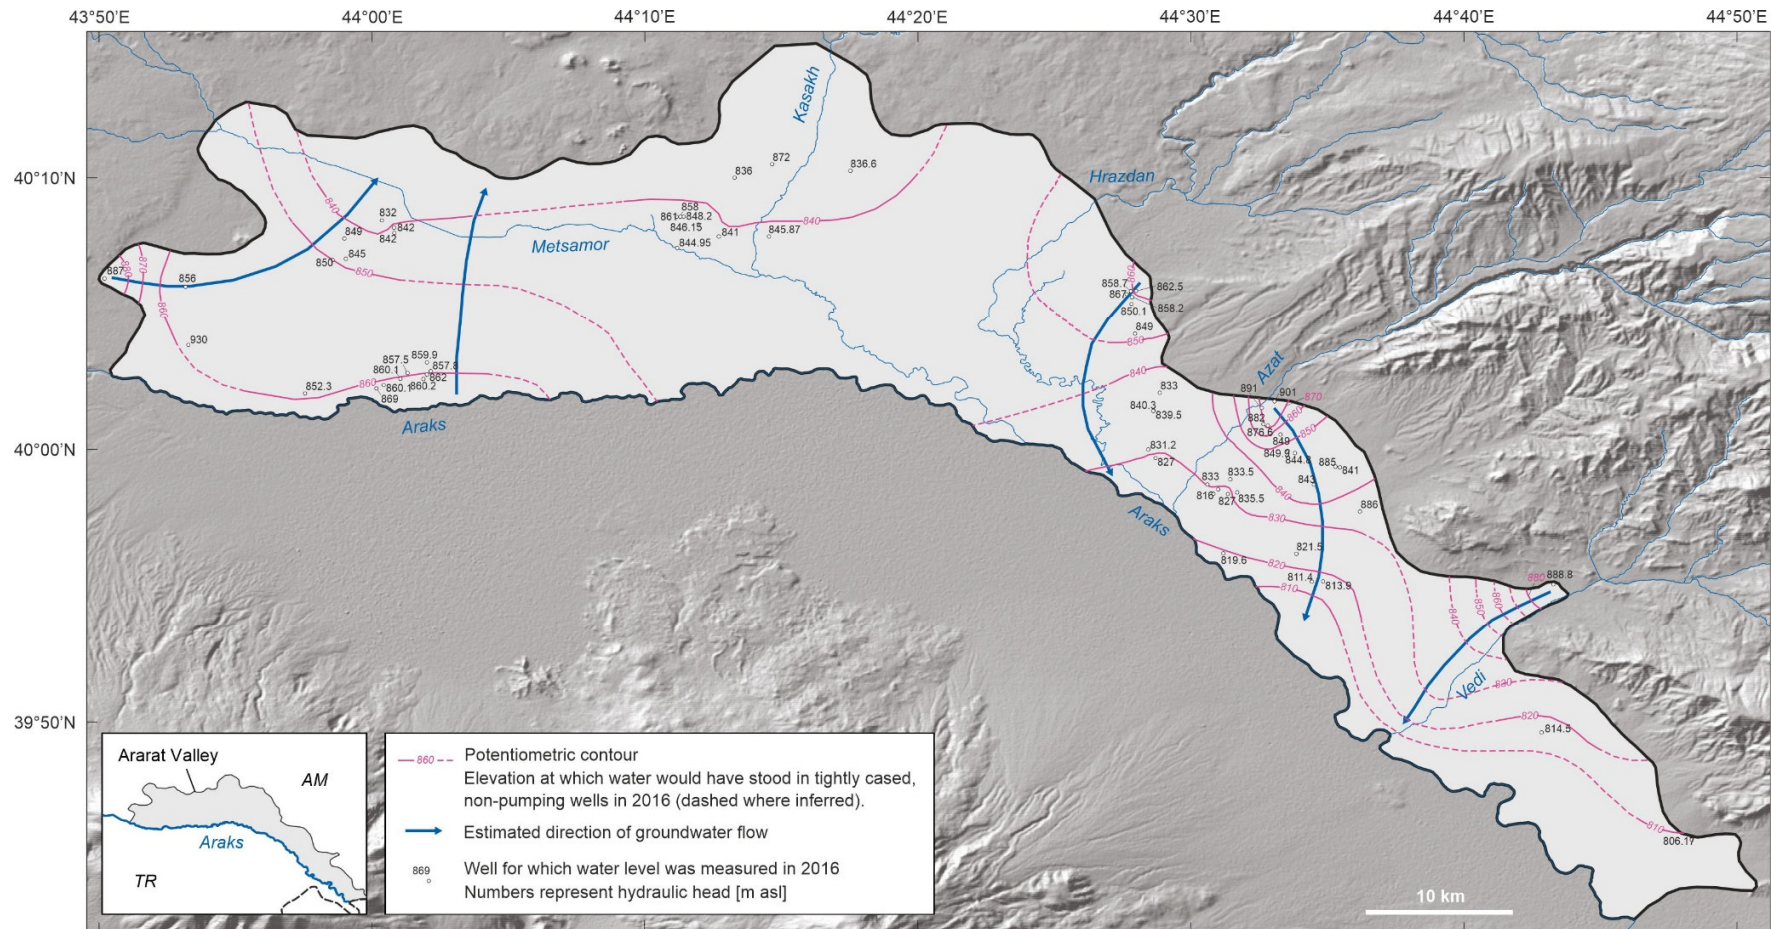

**Fig. S1** Groundwater contour map for Hydrogeologic Unit 2 (Valder et al. 2018, modified). Note that the groundwater flow direction in the west is away from the Araks River (*blue arrows*), indicating losing stream conditions. Further downstream, the Araks River is a gaining stream.

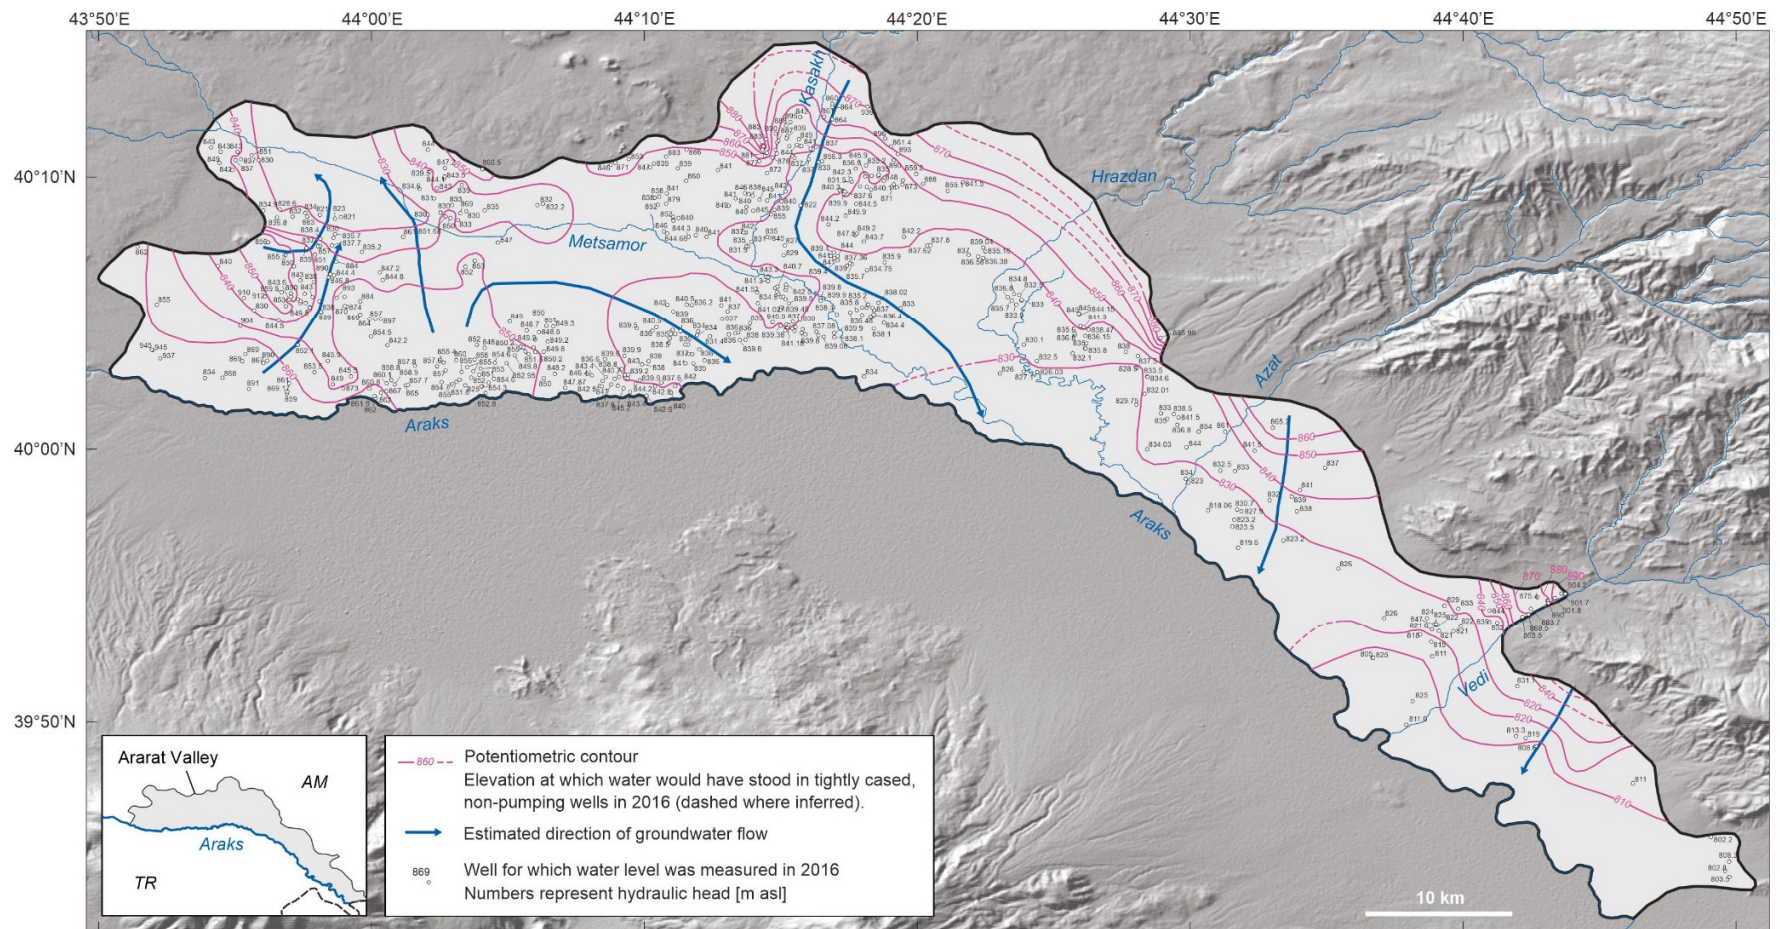

**Fig. S2** Groundwater contour map for Hydrogeologic Unit 4 (Valder et al. 2018, modified).

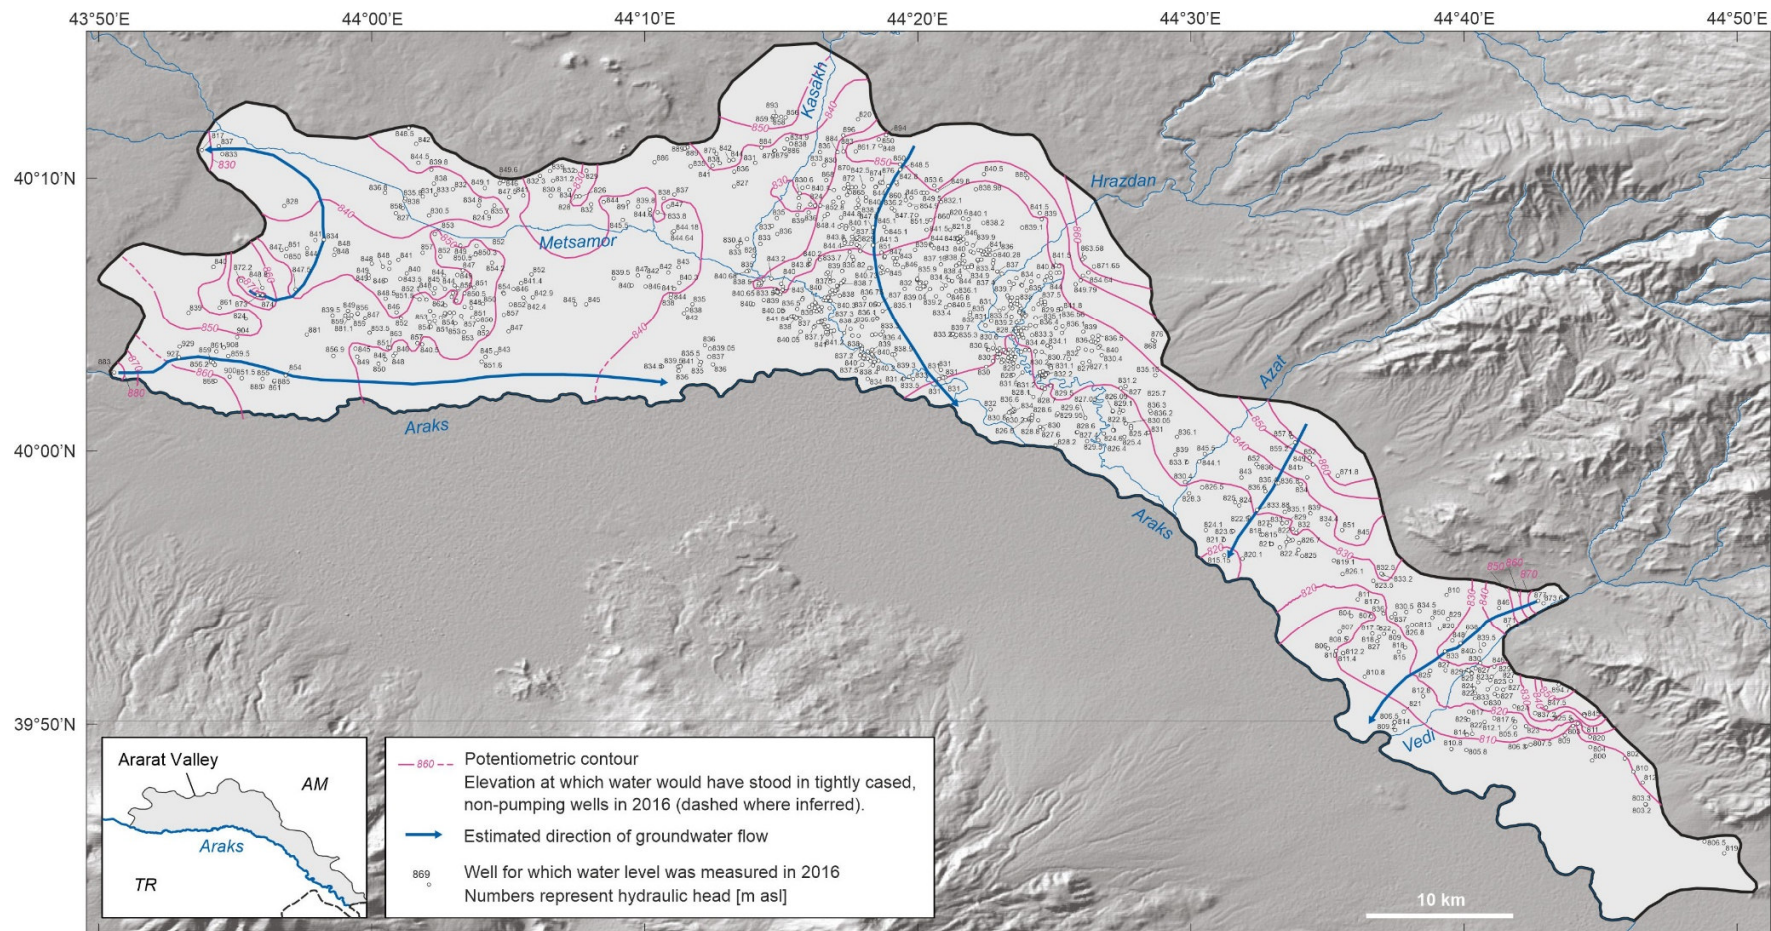

**Fig. S3** Groundwater contour map for Hydrogeologic Unit 6 (Valder et al. 2018, modified).

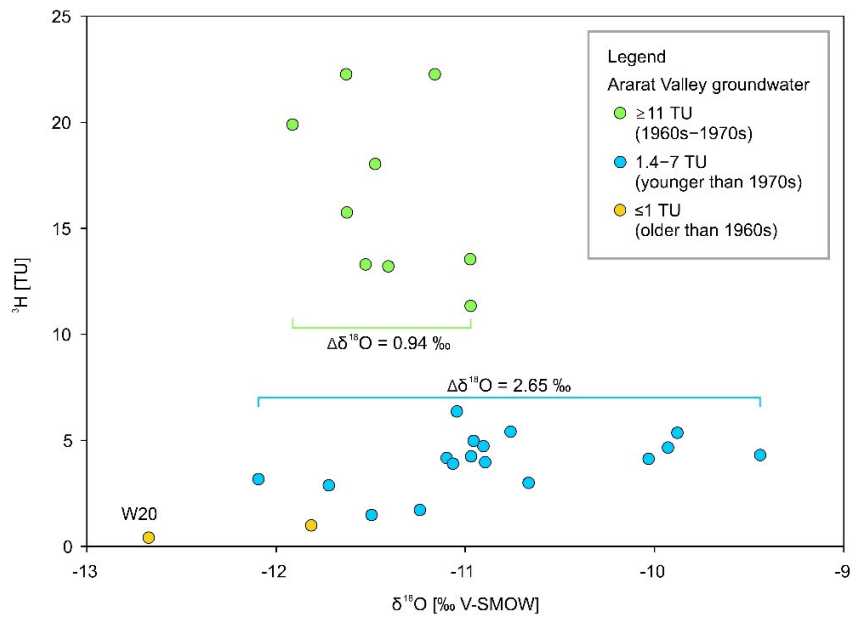

**Fig. S4** Scatter plot  $^3\text{H}$  vs.  $\delta^{18}\text{O}$ . Note the relatively large  $\delta^{18}\text{O}$  scatter in the age cluster “younger than 1970s” (blue symbols; 2.65 ‰), compared to the cluster “1960s–1970s” (green symbols; 0.94 ‰).

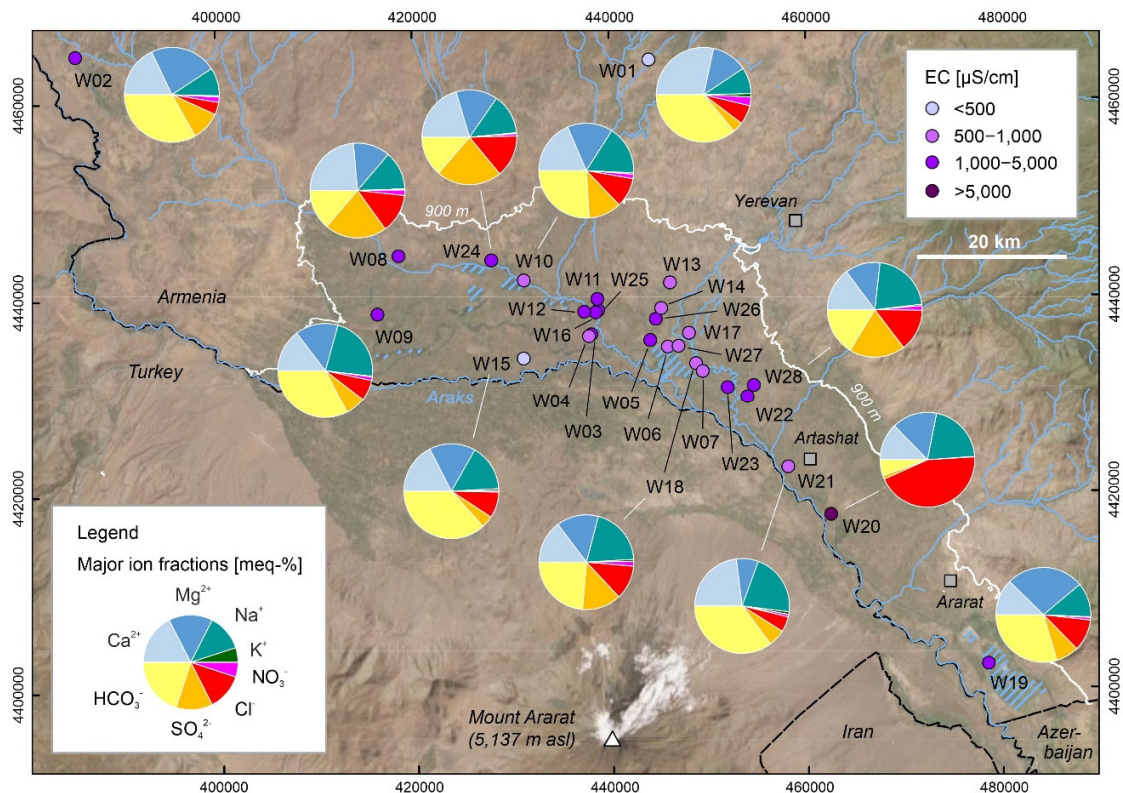

**Fig. S5** Map showing the spatial EC variability (purple symbols) and major ion compositions for selected wells (pie charts). Note the unique hydrochemical character of sample W20, with an EC of 5,930  $\mu\text{S}/\text{cm}$  and a pronounced  $\text{Cl}^-$  dominance among the anions (red pie slice).

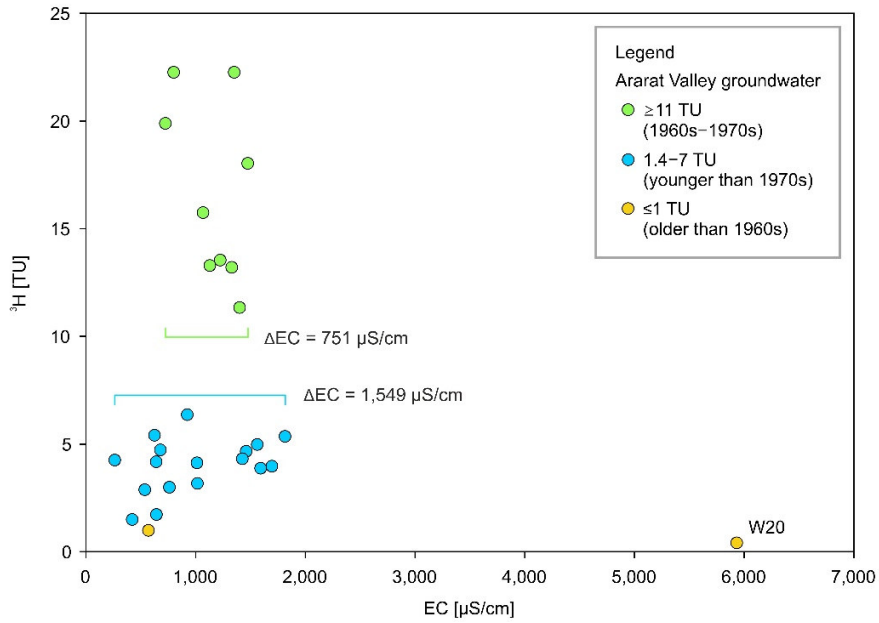

**Fig. S6** Scatter plot  $^3H$  vs. EC. Note the relatively large EC scatter in the age cluster “younger than 1970s” (blue symbols; 1,549  $\mu S/cm$ ), compared to the cluster “1960s-1970s” (green symbols; 751  $\mu S/cm$ ).

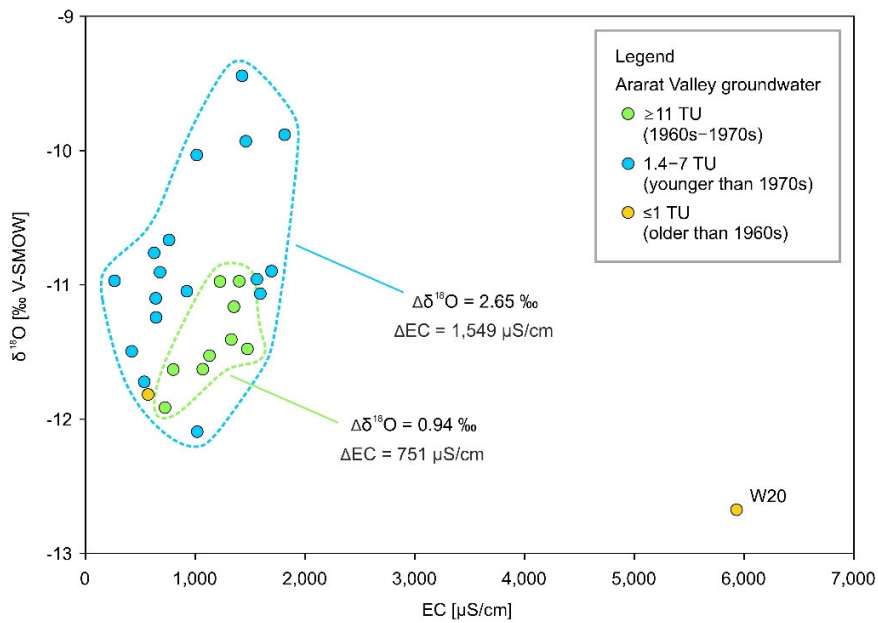

**Fig. S7** Scatter plot  $\delta^{18}O$  vs. EC. Note the larger scatter in the age cluster “younger than 1970s” (blue symbols), compared to the cluster “1960s-1970s” (green symbols), with respect to both parameters.

**Table S1** General information on sampled wells and results of isotopic and hydrochemical analyses

| ID  | Latitude<br>[deg min sec] | Longitude<br>[deg min sec] | Elevation (GoogleEarth)<br>[m asl] | Well depth<br>[m] | Screen depth<br>[m] | Hydrogeological<br>Unit | Artesian<br>(yes/no) |
|-----|---------------------------|----------------------------|------------------------------------|-------------------|---------------------|-------------------------|----------------------|
| W01 | 40° 19' 28.5"             | 44° 20' 29.6"              | 1211                               | 100               | 57-75, 85-93        | 2                       | no                   |
| W02 | 40° 19' 32.7"             | 43° 39' 18.8"              | 1264                               | 125               | 95-115              | 6                       | no                   |
| W03 | 40° 04' 25.0"             | 44° 16' 23.4"              | 836                                | 140               | 115-140             | 6                       | yes                  |
| W04 | 40° 04' 18.6"             | 44° 16' 13.1"              | 837                                | 186               | 105-175             | 6                       | yes                  |
| W05 | 40° 04' 06.1"             | 44° 20' 37.7"              | 832                                | 180               | -                   | 6                       | yes                  |
| W06 | 40° 03' 45.0"             | 44° 21' 53.1"              | 831                                | 130               | -                   | 6                       | yes                  |
| W07 | 40° 02' 49.7"             | 44° 24' 23.9"              | 828                                | 150               | -                   | 6                       | yes                  |
| W08 | 40° 08' 42.2"             | 44° 02' 32.2"              | 869                                | 90                | 54-70               | 6                       | no                   |
| W09 | 40° 05' 29.5"             | 44° 01' 02.3"              | 872                                | 120               | 85-110              | 6                       | no                   |
| W10 | 40° 07' 22.1"             | 44° 11' 32.4"              | 845                                | 145               | 95-130              | 6                       | yes                  |
| W11 | 40° 06' 21.3"             | 44° 16' 49.1"              | 840                                | 130               | 78-125              | 6                       | no                   |
| W12 | 40° 05' 39.0"             | 44° 15' 52.6"              | 839                                | 160               | 95-125              | 6                       | yes                  |
| W13 | 40° 07' 15.8"             | 44° 22' 02.0"              | 841                                | 97                | 48-58, 80-90        | 6                       | no                   |
| W14 | 40° 05' 51.7"             | 44° 21' 24.3"              | 831                                | 93                | 65-87               | 6                       | yes                  |
| W15 | 40° 03' 04.8"             | 44° 11' 31.9"              | 843                                | 80                | 60-75               | 4                       | no                   |
| W16 | 40° 05' 37.3"             | 44° 16' 42.1"              | 839                                | 80                | 60-75               | 4                       | yes                  |
| W17 | 40° 04' 30.1"             | 44° 23' 24.4"              | 831                                | 195               | -                   | 6                       | yes                  |
| W18 | 40° 02' 50.1"             | 44° 23' 54.7"              | 828                                | 80                | 65-75               | 4                       | yes                  |
| W19 | 39° 46' 17.5"             | 44° 44' 56.9"              | 805                                | 148               | 115-140             | 6                       | yes                  |
| W20 | 39° 54' 29.8"             | 44° 33' 37.6"              | 819                                | 170               | 143-165             | 6                       | yes                  |
| W21 | 39° 57' 06.6"             | 44° 30' 32.8"              | 825                                | 120               | 62-100              | 6                       | yes                  |
| W22 | 40° 00' 59.6"             | 44° 27' 36.8"              | 830                                | 110               | 85-100              | 6                       | yes                  |
| W23 | 40° 01' 30.6"             | 44° 26' 11.2"              | 825                                | 190               | 125-185             | 6                       | yes                  |
| W24 | 40° 08' 28.0"             | 44° 09' 12.2"              | 849                                | 90                | 45-70, 75-80        | 6                       | no                   |
| W25 | 40° 05' 43.9"             | 44° 16' 53.4"              | 839                                | 90                | 65-85               | 6                       | yes                  |
| W26 | 40° 05' 16.1"             | 44° 21' 01.5"              | 832                                | 180               | 35-55               | 6                       | yes                  |
| W27 | 40° 03' 47.2"             | 44° 22' 38.8"              | 830                                | 95                | -                   | 6                       | yes                  |
| W28 | 40° 01' 37.8"             | 44° 28' 03.4"              | 834                                | 134               | 50-115              | 6                       | yes                  |

Color code Fig. 1

**Table S1** General information on sampled wells and results of isotopic and hydrochemical analyses (continued)

| ID  | Sampling date | T<br>[°C] | pH<br>[-] | O <sub>2</sub><br>[mg/L] | EC<br>[μS/cm] | <sup>35</sup> S<br>[mBq/L] | <sup>3</sup> H<br>[TU] | <sup>3</sup> H error<br>[TU] | Estimated age      | δ <sup>18</sup> O<br>[‰ V-SMOW] | δ <sup>2</sup> H<br>[‰ V-SMOW] |
|-----|---------------|-----------|-----------|--------------------------|---------------|----------------------------|------------------------|------------------------------|--------------------|---------------------------------|--------------------------------|
| W01 | Dec 2019      | 9.5       | 6.68      | 11.12                    | 263           | -                          | 4.3                    | 0.4                          | younger than 1970s | -10.97                          | -71.9                          |
| W02 | Dec 2019      | 14.4      | 7.05      | 8.50                     | 1015          | -                          | 3.2                    | 0.4                          | younger than 1970s | -12.09                          | -82.1                          |
| W03 | Dec 2019      | 13.8      | 6.61      | 7.17                     | 1399          | -                          | 11.3                   | 0.9                          | 1960s-1970s        | -10.97                          | -75.7                          |
| W04 | Dec 2019      | 15.2      | 7.55      | 5.49                     | 534           | -                          | 2.9                    | 0.4                          | younger than 1970s | -11.72                          | -79.1                          |
| W05 | Dec 2019      | 13.1      | 6.67      | 7.85                     | 1473          | -                          | 18.0                   | 1.3                          | 1960s-1970s        | -11.48                          | -77.6                          |
| W06 | Dec 2019      | 13.4      | 6.69      | 8.98                     | 798           | -                          | 22.3                   | 1.6                          | 1960s-1970s        | -11.63                          | -78.1                          |
| W07 | Dec 2019      | 13.1      | 6.98      | 9.01                     | 623           | -                          | 5.4                    | 0.5                          | younger than 1970s | -10.76                          | -70.4                          |
| W08 | Dec 2019      | 15.3      | 7.42      | 8.24                     | 1591          | -                          | 3.9                    | 0.4                          | younger than 1970s | -11.07                          | -75.6                          |
| W09 | Dec 2019      | 15.4      | 7.31      | 7.17                     | 1011          | -                          | 4.1                    | 0.4                          | younger than 1970s | -10.03                          | -67.6                          |
| W10 | Dec 2019      | 14.2      | 7.36      | 7.18                     | 922           | -                          | 6.4                    | 0.6                          | younger than 1970s | -11.05                          | -74.3                          |
| W11 | Dec 2019      | 12.8      | 7.07      | 5.47                     | 1350          | -                          | 22.3                   | 1.6                          | 1960s-1970s        | -11.16                          | -76.0                          |
| W12 | Dec 2019      | 13.3      | 6.92      | 7.70                     | 1127          | -                          | 13.3                   | 1.0                          | 1960s-1970s        | -11.53                          | -77.7                          |
| W13 | Dec 2019      | 13.9      | 6.56      | 8.44                     | 638           | -                          | 4.2                    | 0.4                          | younger than 1970s | -11.10                          | -72.0                          |
| W14 | Dec 2019      | 14.4      | 6.90      | 8.52                     | 722           | -                          | 19.9                   | 1.5                          | 1960s-1970s        | -11.91                          | -79.1                          |
| W15 | Dec 2019      | 14.2      | 7.89      | 6.14                     | 419           | -                          | 1.5                    | 0.3                          | younger than 1970s | -11.50                          | -78.3                          |
| W16 | Dec 2019      | 13.3      | 7.00      | 7.21                     | 1326          | -                          | 13.2                   | 1.0                          | 1960s-1970s        | -11.41                          | -78.4                          |
| W17 | Dec 2019      | 12.2      | 7.03      | 9.20                     | 677           | -                          | 4.7                    | 0.5                          | younger than 1970s | -10.90                          | -72.3                          |
| W18 | Dec 2019      | 14.7      | 7.14      | 8.40                     | 759           | -                          | 3.0                    | 0.4                          | younger than 1970s | -10.67                          | -71.5                          |
| W19 | Dec 2019      | 16.7      | 7.17      | 1.62                     | 1693          | -                          | 4.0                    | 0.4                          | younger than 1970s | -10.90                          | -74.6                          |
| W20 | Dec 2019      | 21.3      | 6.67      | 1.97                     | 5930          | -                          | 0.4                    | 0.3                          | older than 1960s   | -12.67                          | -87.2                          |
| W21 | Dec 2019      | 15.8      | 7.58      | 5.63                     | 568           | -                          | 1.0                    | 0.3                          | older than 1960s   | -11.81                          | -78.1                          |
| W22 | Dec 2019      | 14.3      | 7.14      | 7.22                     | 1812          | -                          | 5.4                    | 0.5                          | younger than 1970s | -9.88                           | -67.6                          |
| W23 | Dec 2019      | 14.8      | 7.33      | 7.66                     | 1424          | -                          | 4.3                    | 0.5                          | younger than 1970s | -9.44                           | -64.7                          |
| W24 | Oct 2019      | -         | 6.30      | -                        | 1559          | b.d.l.                     | 5.0                    | 0.5                          | younger than 1970s | -10.96                          | -74.8                          |
| W25 | Oct 2019      | -         | 6.90      | -                        | 1223          | b.d.l.                     | 13.6                   | 1.0                          | 1960s-1970s        | -10.97                          | -76.0                          |
| W26 | Oct 2019      | -         | 7.00      | -                        | 1066          | b.d.l.                     | 15.8                   | 1.2                          | 1960s-1970s        | -11.63                          | -78.5                          |
| W27 | Oct 2019      | -         | 7.10      | -                        | 641           | b.d.l.                     | 1.7                    | 0.3                          | younger than 1970s | -11.24                          | -73.5                          |
| W28 | Oct 2019      | -         | 6.80      | -                        | 1459          | b.d.l.                     | 4.7                    | 0.5                          | younger than 1970s | -9.93                           | -66.1                          |

Color code Fig. S5

Color code Fig. 2 – 5, S4, S6, S7



**Table S1** General information on sampled wells and results of isotopic and hydrochemical analyses (continued)

| ID  | Ca <sup>2+</sup><br>[mg/L] | Mg <sup>2+</sup><br>[mg/L] | Na <sup>+</sup><br>[mg/L] | K <sup>+</sup><br>[mg/L] | Sr <sup>2+</sup><br>[mg/L] | NH <sub>4</sub> <sup>+</sup><br>[mg/L] | Li <sup>+</sup><br>[mg/L] | Cl <sup>-</sup><br>[mg/L] | SO <sub>4</sub> <sup>2-</sup><br>[mg/L] | HCO <sub>3</sub> <sup>-</sup><br>[mg/L] | NO <sub>3</sub> <sup>-</sup><br>[mg/L] | NO <sub>2</sub> <sup>-</sup><br>[mg/L] | F <sup>-</sup><br>[mg/L] | Br <sup>-</sup><br>[mg/L] | CBE<br>[%] |
|-----|----------------------------|----------------------------|---------------------------|--------------------------|----------------------------|----------------------------------------|---------------------------|---------------------------|-----------------------------------------|-----------------------------------------|----------------------------------------|----------------------------------------|--------------------------|---------------------------|------------|
| W01 | 30.2                       | 8.0                        | 10.9                      | 2.4                      | 0.20                       | 0.04                                   | 0.04                      | 12.3                      | 9.4                                     | 117                                     | 9.9                                    | 0.005                                  | 0.30                     | 0.47                      | 1.61       |
| W02 | 79.2                       | 61.0                       | 48.8                      | 3.9                      | 0.53                       | 0.20                                   | 0.10                      | 32.7                      | 106.0                                   | 446                                     | 24.8                                   | <0.065                                 | 0.69                     | 0.42                      | 1.65       |
| W03 | 105.7                      | 73.6                       | 85.6                      | 4.9                      | 0.67                       | <0.20                                  | 0.14                      | 157.2                     | 286.4                                   | 285                                     | 22.3                                   | <0.065                                 | 0.21                     | 1.04                      | -0.77      |
| W04 | 34.8                       | 22.9                       | 38.5                      | 2.3                      | 0.24                       | 0.11                                   | 0.07                      | 41.1                      | 42.7                                    | 200                                     | 6.3                                    | 0.046                                  | 0.22                     | 0.51                      | -0.63      |
| W05 | 123.4                      | 76.9                       | 78.1                      | 5.4                      | 0.84                       | <0.20                                  | 0.14                      | 156.1                     | 312.6                                   | 307                                     | 20.6                                   | 0.055                                  | 0.33                     | 1.11                      | -0.73      |
| W06 | 70.3                       | 31.2                       | 46.4                      | 4.5                      | 0.47                       | <0.13                                  | 0.07                      | 59.9                      | 126.6                                   | 227                                     | 14.4                                   | 0.017                                  | 0.33                     | 0.78                      | -0.33      |
| W07 | 42.8                       | 28.5                       | 54.9                      | 3.1                      | 0.19                       | <0.13                                  | 0.06                      | 51.8                      | 63.9                                    | 200                                     | 12.6                                   | 0.006                                  | 0.58                     | 1.34                      | 5.13       |
| W08 | 166.6                      | 54.1                       | 107.0                     | 5.2                      | 1.29                       | 0.23                                   | 0.15                      | 167.3                     | 358.4                                   | 295                                     | 39.9                                   | 0.017                                  | 0.17                     | 1.53                      | -0.23      |
| W09 | 64.7                       | 39.3                       | 113.9                     | 2.0                      | 1.00                       | <0.20                                  | 0.10                      | 55.5                      | 74.0                                    | 438                                     | 16.5                                   | 0.007                                  | 0.68                     | 0.38                      | 4.28       |
| W10 | 72.9                       | 36.8                       | 75.5                      | 3.1                      | 0.67                       | <0.20                                  | 0.08                      | 70.4                      | 105.1                                   | 311                                     | 18.3                                   | 0.004                                  | 0.19                     | 0.39                      | 2.47       |
| W11 | 125.5                      | 71.6                       | 75.6                      | 6.0                      | 0.86                       | <0.20                                  | 0.14                      | 136.0                     | 312.1                                   | 293                                     | 22.9                                   | 0.037                                  | 0.29                     | 0.96                      | 0.39       |
| W12 | 95.7                       | 66.8                       | 55.3                      | 3.5                      | 0.90                       | <0.20                                  | 0.15                      | 101.8                     | 240.7                                   | 262                                     | 19.2                                   | 0.089                                  | 0.28                     | 0.88                      | 1.19       |
| W13 | 51.3                       | 21.9                       | 42.0                      | 3.0                      | 0.34                       | <0.13                                  | 0.08                      | 59.6                      | 71.7                                    | 176                                     | 12.7                                   | 0.025                                  | 0.44                     | 0.52                      | 0.11       |
| W14 | 62.9                       | 28.8                       | 43.3                      | 3.8                      | 0.31                       | <0.13                                  | 0.08                      | 52.7                      | 102.1                                   | 224                                     | 13.6                                   | 0.005                                  | 0.49                     | 0.59                      | -0.06      |
| W15 | 28.5                       | 15.5                       | 29.7                      | 2.0                      | 0.14                       | <0.10                                  | 0.04                      | 25.7                      | 16.2                                    | 182                                     | 2.6                                    | 0.021                                  | 0.19                     | 0.90                      | -0.42      |
| W16 | 109.7                      | 73.5                       | 67.1                      | 4.1                      | 0.98                       | <0.20                                  | 0.13                      | 129.5                     | 299.8                                   | 272                                     | 22.4                                   | <0.065                                 | 0.28                     | 0.90                      | -0.48      |
| W17 | 50.9                       | 25.9                       | 44.2                      | 2.7                      | 0.36                       | 0.10                                   | 0.06                      | 54.8                      | 68.6                                    | 185                                     | 14.1                                   | 0.012                                  | 0.60                     | 0.49                      | 3.39       |
| W18 | 45.0                       | 26.6                       | 70.0                      | 4.0                      | 0.32                       | 0.11                                   | 0.08                      | 63.0                      | 97.5                                    | 221                                     | 15.8                                   | 0.007                                  | 0.66                     | 0.55                      | -0.56      |
| W19 | 98.8                       | 127.7                      | 107.0                     | 3.9                      | 1.31                       | <0.33                                  | 0.16                      | 151.6                     | 148.9                                   | 717                                     | 21.1                                   | 0.017                                  | 0.54                     | 1.33                      | 1.91       |
| W20 | 314.7                      | 230.7                      | 587.8                     | 6.1                      | 8.60                       | 0.99                                   | <0.20                     | 1933.6                    | 77.1                                    | 407                                     | 3.5                                    | 0.043                                  | 0.10                     | 6.05                      | -1.84      |
| W21 | 53.9                       | 10.6                       | 57.6                      | 4.0                      | 0.33                       | 0.11                                   | 0.05                      | 21.5                      | 32.8                                    | 251                                     | 6.3                                    | 0.035                                  | 0.27                     | 0.95                      | 5.77       |
| W22 | 286.9                      | 49.3                       | 53.9                      | 5.2                      | 1.63                       | 0.29                                   | 0.12                      | 156.8                     | 423.5                                   | 407                                     | 33.6                                   | 0.013                                  | 0.32                     | 1.30                      | 1.06       |
| W23 | 93.3                       | 48.2                       | 140.2                     | 6.2                      | 0.87                       | 0.16                                   | 0.09                      | 138.0                     | 282.9                                   | 298                                     | 28.3                                   | 0.012                                  | 0.75                     | 0.89                      | -0.71      |
| W24 | 135.5                      | 57.4                       | 104.5                     | 4.1                      | 0.62                       | 0.14                                   | 0.05                      | 168.3                     | 355.5                                   | 277                                     | 18.6                                   | <0.078                                 | 0.25                     | 2.62                      | -2.50      |
| W25 | 100.3                      | 61.3                       | 58.5                      | 4.6                      | 0.62                       | 0.18                                   | 0.07                      | 111.9                     | 261.9                                   | 273                                     | 17.2                                   | <0.065                                 | 0.35                     | 2.30                      | -2.43      |
| W26 | 90.6                       | 52.2                       | 49.0                      | 3.0                      | 0.63                       | 0.45                                   | 0.06                      | 85.1                      | 216.1                                   | 272                                     | 15.3                                   | 0.142                                  | 0.22                     | 2.30                      | -2.49      |
| W27 | 39.0                       | 27.1                       | 42.0                      | 1.7                      | <0.17                      | 0.15                                   | 0.04                      | 50.1                      | 72.7                                    | 204                                     | 9.7                                    | 0.066                                  | 0.44                     | 1.74                      | -3.03      |
| W28 | 88.1                       | 42.8                       | 145.0                     | 5.9                      | 0.74                       | 0.13                                   | 0.04                      | 151.2                     | 271.8                                   | 294                                     | 28.3                                   | <0.065                                 | 0.68                     | 2.24                      | -2.71      |

Abbreviations: b.d.l. below detection limit; CBE Charge Balance Error

## **ESM References**

Valder JF, Carter JM, Medler CJ, Thompson RF, Anderson MT (2018) Hydrogeologic framework and groundwater conditions of the Ararat Basin in Armenia, U.S. Geological Survey Scientific Investigations Report 2017–5163, 40 p., doi 10.3133/sir20175163
